# Supplementary material for: Aromatic pathways in mono- and bisphosphorous singly Möbius twisted [28] and [30]hexaphyrins
Source: Royal Society of Chemistry journal article supplement (doi:10.1039/c1cp21935a), 2011-01-01
Supplement: c1cp21935a.pdf [file c1cp21935a.pdf]

# Aromatic Pathways in Mono- and Bisphosphorous Singly Möbius Twisted [28] and [30]Hexaphyrins<sup>†</sup>

Heike Fliegl,<sup>\*a</sup> Dage Sundholm,<sup>a</sup> Fabio Pichierri,<sup>b‡</sup>

Received Xth XXXXXXXXXXXX 20XX, Accepted Xth XXXXXXXXXXXX 20XX

First published on the web Xth XXXXXXXXXXXX 200X

DOI: 10.1039/b000000x

## 1 Molecular structures

The Cartesian coordinates (in Å) of the hexaphyrins optimized at the B3LYP/def2-TZVP level.

### Monophosphorous [28]hexaphyrin

117

|   |            |            |            |
|---|------------|------------|------------|
| C | -1.1319621 | 5.4064313  | 0.6784493  |
| C | -0.6724893 | 4.4795644  | -0.2574599 |
| C | 0.0979920  | 4.9785827  | -1.3091593 |
| C | 0.3838984  | 6.3298518  | -1.4413180 |
| C | -0.0995596 | 7.2262425  | -0.4967401 |
| C | -0.8580138 | 6.7640983  | 0.5694974  |
| C | -0.9900470 | 3.0178396  | -0.1550556 |
| C | 0.0924737  | 2.1923030  | 0.2549408  |
| C | 0.3651717  | 0.8204882  | 0.1062521  |
| C | 1.6931434  | 0.5952532  | 0.4926765  |
| C | 2.2211536  | 1.8324610  | 0.9587718  |
| N | 1.2359145  | 2.7557243  | 0.7986964  |
| P | 2.7245977  | -0.8353596 | 0.6792456  |
| O | 2.4704115  | -1.6923463 | 1.8393184  |
| C | 3.5108615  | 2.1054614  | 1.4813754  |
| C | 3.8072382  | 3.4110638  | 2.1205994  |
| C | 4.6780209  | 4.3440348  | 1.5530137  |
| C | 4.9709791  | 5.5533396  | 2.1684159  |
| C | 4.3775863  | 5.8656571  | 3.3837467  |
| C | 3.4973523  | 4.9679310  | 3.9731285  |
| C | 3.2258294  | 3.7625448  | 3.3419332  |
| F | 5.2551097  | 4.0909702  | 0.3741812  |
| F | 5.8078881  | 6.4180922  | 1.5965077  |
| F | 4.6495927  | 7.0215735  | 3.9805336  |
| F | 2.9321366  | 5.2625266  | 5.1423804  |
| F | 2.3919801  | 2.9136727  | 3.9472334  |

|   |            |            |            |
|---|------------|------------|------------|
| F | 0.5679741  | 4.1453351  | -2.2408617 |
| F | 1.1095511  | 6.7733868  | -2.4669525 |
| F | 0.1679126  | 8.5238572  | -0.6120823 |
| F | -1.3144212 | 7.6223133  | 1.4810713  |
| F | -1.8540828 | 4.9998960  | 1.7252064  |
| N | 2.9815265  | -1.7424524 | -0.7704689 |
| C | 4.2668250  | -2.1232428 | -1.1904717 |
| C | 4.1248978  | -2.8067514 | -2.4018517 |
| C | 2.7780046  | -2.8107731 | -2.7410615 |
| C | 2.0592203  | -2.2100069 | -1.7081625 |
| C | 5.4588227  | -1.7364309 | -0.5193203 |
| C | 5.4366350  | -0.7047466 | 0.3864382  |
| N | 4.2300480  | -0.0460665 | 0.6594905  |
| C | 4.4974020  | 1.1521228  | 1.3172324  |
| C | 5.9053122  | 1.1703508  | 1.5724188  |
| C | 6.4668548  | 0.0549530  | 1.0196787  |
| C | 0.6302439  | -2.1695732 | -1.5470115 |
| C | 0.0079588  | -2.6193514 | -0.3880827 |
| N | -1.3096222 | -2.3896066 | -0.1069705 |
| C | -1.6208526 | -3.2027706 | 0.9123699  |
| C | -0.4554351 | -3.9740836 | 1.3421516  |
| C | 0.5690649  | -3.5778430 | 0.5639628  |
| C | -2.9277224 | -3.3071710 | 1.4536714  |
| C | -3.2330412 | -4.4334700 | 2.3774450  |
| C | -3.2408461 | -5.7588747 | 1.9395341  |
| C | -3.5070634 | -6.8191912 | 2.7938179  |
| C | -3.7775639 | -6.5689717 | 4.1320506  |
| C | -3.7798407 | -5.2636663 | 4.6028478  |
| C | -3.5104377 | -4.2200415 | 3.7284901  |
| F | -3.0068938 | -6.0392463 | 0.6543172  |
| F | -3.5160902 | -8.0727173 | 2.3379444  |
| F | -4.0358102 | -7.5778876 | 4.9608412  |
| F | -4.0310183 | -5.0225907 | 5.8904373  |
| F | -3.5014629 | -2.9796748 | 4.2265702  |
| C | 6.7389055  | -2.3860633 | -0.8980286 |
| C | 7.0018431  | -3.7097534 | -0.5428851 |
| C | 8.1887306  | -4.3427334 | -0.8817265 |
| C | 9.1543152  | -3.6484563 | -1.5981265 |
| C | 8.9247336  | -2.3312791 | -1.9697843 |

<sup>a</sup> University of Helsinki, Department of Chemistry, P.O. Box 55 (A.I. Virtanens plats 1), FIN-00014 University of Helsinki, Finland. E-mail: Heike.Fliegl@helsinki.fi, Dage.Sundholm@helsinki.fi

<sup>b</sup> Tohoku University, G-COE Laboratory, Department of Applied Chemistry, Graduate School of Engineering, Tohoku University, E-mail: fabio@che.tohoku.ac.jp

|   |             |            |            | <b>Bisphosphorous [30]hexaphyrin</b> |            |            |            |
|---|-------------|------------|------------|--------------------------------------|------------|------------|------------|
| C | 7.7285972   | -1.7199193 | -1.6205954 |                                      |            |            |            |
| F | 6.1027986   | -4.4017206 | 0.1604123  |                                      |            |            |            |
| F | 8.4118342   | -5.6050322 | -0.5176864 |                                      |            |            |            |
| F | 10.2970773  | -4.2439310 | -1.9265194 | 118                                  |            |            |            |
| F | 9.8479463   | -1.6658050 | -2.6639631 | N                                    | 1.6551827  | 1.8070171  | 0.1974730  |
| F | 7.5368514   | -0.4562875 | -2.0137867 | C                                    | 1.9782891  | 2.8266767  | 1.1730318  |
| C | -0.1702686  | -1.7684041 | -2.7212600 | C                                    | 0.8191253  | 3.6475928  | 1.3462581  |
| C | -1.2280276  | -2.5506004 | -3.2049259 | C                                    | -0.1236978 | 3.2706592  | 0.4647985  |
| C | -1.9864531  | -2.1673016 | -4.3000394 | C                                    | 0.3713514  | 2.1699857  | -0.3296686 |
| C | -1.7007101  | -0.9790573 | -4.9578920 | C                                    | 3.2230294  | 3.0079338  | 1.7062256  |
| C | -0.6474446  | -0.1882429 | -4.5220917 | C                                    | 3.5093899  | 4.1162360  | 2.6488086  |
| C | 0.1021499   | -0.5916217 | -3.4296251 | C                                    | 3.4587521  | 5.4571414  | 2.2671001  |
| F | -1.5032913  | -3.7340565 | -2.6589618 | C                                    | 3.7474263  | 6.4877214  | 3.1505542  |
| F | -2.9761058  | -2.9447377 | -4.7413140 | C                                    | 4.1094997  | 6.1894590  | 4.4563399  |
| F | -2.4243546  | -0.6066416 | -6.0098472 | C                                    | 4.1793684  | 4.8654048  | 4.8678874  |
| F | -0.3704763  | 0.9562709  | -5.1491259 | C                                    | 3.8829787  | 3.8522677  | 3.9680992  |
| F | 1.0908394   | 0.2180236  | -3.0335291 | C                                    | -0.2413862 | 1.7122000  | -1.4652146 |
| C | -3.9513188  | -2.4228100 | 1.1335609  | C                                    | 0.4779104  | 0.9549819  | -2.5117028 |
| C | -5.3615054  | -2.5703655 | 1.3767632  | C                                    | 1.6796241  | 1.4240901  | -3.0595229 |
| C | -5.9993763  | -1.5082932 | 0.8189627  | C                                    | 2.3330501  | 0.7659582  | -4.0896556 |
| C | -5.0026489  | -0.6290272 | 0.2628743  | C                                    | 1.7993463  | -0.4066235 | -4.6049623 |
| N | -3.7958574  | -1.2346932 | 0.4716038  | C                                    | 0.6030726  | -0.8963794 | -4.1007144 |
| C | -5.1988245  | 0.6197781  | -0.3123167 | C                                    | -0.0412660 | -0.2143103 | -3.0819123 |
| C | -6.6119217  | 1.0122155  | -0.6004395 | F                                    | 3.1389850  | 5.7875844  | 1.0111061  |
| C | -7.2760288  | 0.5452571  | -1.7336744 | F                                    | 3.6911679  | 7.7587598  | 2.7497669  |
| C | -8.5873003  | 0.8982793  | -2.0219962 | F                                    | 4.3904193  | 7.1694612  | 5.3112411  |
| C | -9.2724083  | 1.7430521  | -1.1603536 | F                                    | 4.5216566  | 4.5783559  | 6.1238405  |
| C | -8.6428600  | 2.2256971  | -0.0213738 | F                                    | 3.9471791  | 2.5926396  | 4.4012561  |
| C | -7.3311446  | 1.8573270  | 0.2432965  | F                                    | 2.2132521  | 2.5703880  | -2.6296100 |
| F | -6.6451294  | -0.2620526 | -2.5924826 | F                                    | 3.4567703  | 1.2630446  | -4.6035259 |
| F | -9.1894607  | 0.4366953  | -3.1188461 | F                                    | 2.4258653  | -1.0527071 | -5.5856170 |
| F | -10.5304970 | 2.0886552  | -1.4243642 | F                                    | 0.0854307  | -2.0218151 | -4.5948792 |
| F | -9.3031080  | 3.0322174  | 0.8109546  | F                                    | -1.1957779 | -0.7199002 | -2.6375306 |
| F | -6.7625349  | 2.3316297  | 1.3559325  | P                                    | 2.4345714  | 0.3175249  | 0.7596363  |
| C | -4.1750578  | 1.5694182  | -0.5693520 | O                                    | 1.9538816  | -0.0514640 | 2.0879825  |
| N | -2.8776055  | 1.4251017  | -0.2382623 | C                                    | 4.2949301  | 2.1765825  | 1.2689095  |
| C | -2.2936775  | 2.6413859  | -0.4718420 | C                                    | 5.6581564  | 2.3889013  | 1.1158546  |
| C | -3.2693242  | 3.5687805  | -1.0397633 | C                                    | 6.1634362  | 1.3659776  | 0.3001256  |
| C | -4.4354975  | 2.8989610  | -1.1129966 | C                                    | 5.1146176  | 0.5121079  | -0.0219385 |
| H | 2.3295865   | -3.2681956 | -3.6079931 | N                                    | 3.9807848  | 0.9876194  | 0.6210636  |
| H | 4.9372469   | -3.2289211 | -2.9702424 | C                                    | 5.0105477  | -0.6245309 | -0.8543248 |
| H | 7.5163915   | -0.1870620 | 0.9867860  | C                                    | 6.2316935  | -1.0873258 | -1.5694845 |
| H | 6.4278195   | 1.9752171  | 2.0625575  | C                                    | 6.6519746  | -0.4760801 | -2.7492665 |
| H | -0.3417484  | 0.1005477  | -0.2640226 | C                                    | 7.8036002  | -0.8701703 | -3.4162172 |
| H | -3.0820563  | 4.5837213  | -1.3504522 | C                                    | 8.5728034  | -1.9031182 | -2.8986131 |
| H | -5.3786931  | 3.2649224  | -1.4850380 | C                                    | 8.1863687  | -2.5303354 | -1.7221772 |
| H | -7.0596552  | -1.3186220 | 0.8121537  | C                                    | 7.0312229  | -2.1160982 | -1.0734645 |
| H | -5.8126439  | -3.4048953 | 1.8870300  | F                                    | 5.9323973  | 0.5179337  | -3.2741406 |
| H | -0.4284003  | -4.7026801 | 2.1366706  | F                                    | 8.1729733  | -0.2683954 | -4.5466479 |
| H | 1.5852194   | -3.9312536 | 0.5857090  | F                                    | 9.6780539  | -2.2914421 | -3.5288146 |
| H | 1.3322093   | 3.7305723  | 1.0264659  | F                                    | 8.9267850  | -3.5204173 | -1.2229295 |
| H | -2.9049877  | -0.8662252 | 0.1599378  | F                                    | 6.6958895  | -2.7350723 | 0.0623861  |
|   |             |            |            | C                                    | 3.8461082  | -1.3352617 | -0.9476551 |

|   |            |            |            |   |            |            |            |
|---|------------|------------|------------|---|------------|------------|------------|
| C | 3.7304982  | -2.6443556 | -1.4994689 | C | -3.9196729 | 2.1817265  | -1.5912996 |
| C | 2.6399047  | -3.2394584 | -0.9805371 | C | -3.5380181 | 2.7868376  | -2.7804896 |
| C | 1.9033688  | -2.3316869 | -0.1478557 | C | -2.1419711 | 2.6851375  | -2.8890209 |
| N | 2.6190549  | -1.0592582 | -0.2336651 | C | -1.6480960 | 2.0542893  | -1.7623118 |
| C | 0.7568118  | -2.7519282 | 0.5015868  | N | -2.7480518 | 1.7225225  | -0.9648293 |
| C | 0.5673000  | -4.2281756 | 0.6331375  | H | -1.5345813 | 3.0434373  | -3.7044908 |
| C | -0.4140786 | -4.9152193 | -0.0858467 | H | -4.2095501 | 3.2198527  | -3.5032861 |
| C | -0.6213999 | -6.2794280 | 0.0580675  | H | -7.6102218 | 0.6468997  | 0.2728808  |
| C | 0.1682356  | -7.0012577 | 0.9436552  | H | -6.8203598 | -1.2698481 | 1.9018470  |
| C | 1.1535592  | -6.3531833 | 1.6752843  | H | 0.0395040  | -0.1242305 | -0.1669418 |
| C | 1.3410516  | -4.9863621 | 1.5155312  | H | 2.3154105  | -4.2461901 | -1.1791604 |
| F | -1.1722377 | -4.2590726 | -0.9699461 | H | 4.4610779  | -3.0890047 | -2.1542946 |
| F | -1.5589981 | -6.9027160 | -0.6552720 | H | 7.1774186  | 1.2636643  | -0.0494228 |
| F | -0.0199429 | -8.3093991 | 1.0896552  | H | 6.2024121  | 3.2358013  | 1.4995300  |
| F | 1.9061017  | -7.0436944 | 2.5305213  | H | 0.7703392  | 4.4866361  | 2.0200284  |
| F | 2.2901001  | -4.4027846 | 2.2476379  | H | -1.0699198 | 3.7512938  | 0.2925291  |
| C | -0.3497408 | -1.9475677 | 0.9104147  | H | -1.6070060 | -3.2883637 | 1.9879974  |
| C | -0.6046189 | -0.6733551 | 0.4757544  |   |            |            |            |
| C | -1.8959498 | -0.3165343 | 0.8473299  |   |            |            |            |
| C | -2.4640526 | -1.4122825 | 1.5225746  |   |            |            |            |
| N | -1.4840436 | -2.3746526 | 1.5852962  |   |            |            |            |
| C | -3.8419359 | -1.5509878 | 1.8927787  |   |            |            |            |
| C | -4.2896391 | -2.6976012 | 2.7168832  |   |            |            |            |
| C | -5.1500474 | -3.6844324 | 2.2284052  |   |            |            |            |
| C | -5.5718901 | -4.7527413 | 3.0075208  |   |            |            |            |
| C | -5.1219146 | -4.8684854 | 4.3151621  |   |            |            |            |
| C | -4.2557185 | -3.9147214 | 4.8323786  |   |            |            |            |
| C | -3.8544886 | -2.8511598 | 4.0368309  |   |            |            |            |
| P | -2.8167681 | 1.1494322  | 0.6493472  |   |            |            |            |
| O | -2.6618686 | 2.2285088  | 1.6305442  |   |            |            |            |
| F | -5.5873385 | -3.6294040 | 0.9659224  |   |            |            |            |
| F | -6.3937130 | -5.6736153 | 2.5041212  |   |            |            |            |
| F | -5.5173418 | -5.8900944 | 5.0690225  |   |            |            |            |
| F | -3.8279769 | -4.0190961 | 6.0899367  |   |            |            |            |
| F | -3.0380381 | -1.9422625 | 4.5758323  |   |            |            |            |
| C | -4.7413929 | -0.6432752 | 1.3684584  |   |            |            |            |
| C | -6.1827579 | -0.5850373 | 1.3673861  |   |            |            |            |
| C | -6.5915719 | 0.4058037  | 0.5292342  |   |            |            |            |
| C | -5.4310538 | 1.0307852  | -0.0486050 |   |            |            |            |
| N | -4.3275628 | 0.4116254  | 0.5503375  |   |            |            |            |
| C | -5.2372969 | 1.9188966  | -1.0710513 |   |            |            |            |
| C | -6.3955864 | 2.5695393  | -1.7347742 |   |            |            |            |
| C | -6.6404379 | 3.9343888  | -1.5801864 |   |            |            |            |
| C | -7.7098308 | 4.5667049  | -2.1973267 |   |            |            |            |
| C | -8.5728534 | 3.8294239  | -2.9967810 |   |            |            |            |
| C | -8.3590374 | 2.4698739  | -3.1723858 |   |            |            |            |
| C | -7.2804201 | 1.8601396  | -2.5464500 |   |            |            |            |
| F | -5.8416792 | 4.6705048  | -0.8046516 |   |            |            |            |
| F | -7.9206470 | 5.8711670  | -2.0202575 |   |            |            |            |
| F | -9.6037370 | 4.4246449  | -3.5911899 |   |            |            |            |
| F | -9.1836968 | 1.7609806  | -3.9443624 |   |            |            |            |
| F | -7.0981868 | 0.5516457  | -2.7547556 |   |            |            |            |

  

## 2 Calculated NMR shieldings

Calculated B3LYP/def2-TZVP nuclear magnetic resonance shieldings in ppm. Tetramethylsilane (TMS) reference shieldings obtained at the same level of theory are 183.746 ppm ( $^{31}\text{C}$ ) and 31.913 ppm ( $^1\text{H}$ ).

### Monophosphorous [28]hexaphyrin

| NO. | TYPE | ISOTROPIC    |
|-----|------|--------------|
| 1   | c    | 24.95507295  |
| 2   | c    | 57.54371399  |
| 3   | c    | 26.50171487  |
| 4   | c    | 36.22460504  |
| 5   | c    | 31.40447721  |
| 6   | c    | 35.89907962  |
| 7   | c    | 66.05791079  |
| 8   | c    | 46.11719600  |
| 9   | c    | 47.59987998  |
| 10  | c    | 66.18819240  |
| 11  | c    | 38.51286004  |
| 12  | n    | 94.74169677  |
| 13  | p    | 300.80822858 |
| 14  | o    | 98.15715723  |
| 15  | c    | 89.93509480  |
| 16  | c    | 65.02526356  |
| 17  | c    | 26.88132075  |
| 18  | c    | 35.39642267  |
| 19  | c    | 31.16345736  |
| 20  | c    | 34.93814961  |
| 21  | c    | 25.42429705  |
| 22  | f    | 311.48747087 |
| 23  | f    | 337.52048152 |
| 24  | f    | 325.16860223 |

|    |   |              |     |   |              |
|----|---|--------------|-----|---|--------------|
| 25 | f | 339.87841725 | 77  | c | 28.68155546  |
| 26 | f | 311.01246229 | 78  | f | 304.85941464 |
| 27 | f | 309.18509441 | 79  | f | 342.65050585 |
| 28 | f | 340.20212725 | 80  | f | 328.04135543 |
| 29 | f | 327.11608563 | 81  | f | 346.21471849 |
| 30 | f | 339.38849663 | 82  | f | 313.71483189 |
| 31 | f | 311.06861526 | 83  | c | 33.36270074  |
| 32 | n | 49.87614019  | 84  | c | 50.30230139  |
| 33 | c | 38.66741333  | 85  | c | 49.01653795  |
| 34 | c | 52.56503220  | 86  | c | 32.51129693  |
| 35 | c | 57.08297285  | 87  | n | 90.65746370  |
| 36 | c | 48.94280178  | 88  | c | 76.80505933  |
| 37 | c | 80.47222501  | 89  | c | 58.39113975  |
| 38 | c | 42.09075641  | 90  | c | 25.30389987  |
| 39 | n | 101.78692286 | 91  | c | 36.61039927  |
| 40 | c | 40.03977885  | 92  | c | 31.65017281  |
| 41 | c | 54.86265505  | 93  | c | 36.51519564  |
| 42 | c | 55.00968311  | 94  | c | 24.47810685  |
| 43 | c | 61.47759841  | 95  | f | 311.34444044 |
| 44 | c | 13.48179707  | 96  | f | 343.57524898 |
| 45 | n | -72.32710180 | 97  | f | 328.41453098 |
| 46 | c | 3.30305070   | 98  | f | 343.36813782 |
| 47 | c | 49.65398346  | 99  | f | 310.15575167 |
| 48 | c | 42.98608049  | 100 | c | 14.03391767  |
| 49 | c | 77.20246392  | 101 | n | -23.71959220 |
| 50 | c | 59.70898733  | 102 | c | 22.44530282  |
| 51 | c | 25.24399118  | 103 | c | 44.42367250  |
| 52 | c | 36.01387828  | 104 | c | 47.40665698  |
| 53 | c | 31.67912930  | 105 | h | 24.80979685  |
| 54 | c | 36.31666308  | 106 | h | 23.58954899  |
| 55 | c | 26.37113896  | 107 | h | 23.36747885  |
| 56 | f | 310.12866231 | 108 | h | 23.43175105  |
| 57 | f | 343.64751850 | 109 | h | 32.88487225  |
| 58 | f | 328.47640445 | 110 | h | 24.21106090  |
| 59 | f | 344.02008511 | 111 | h | 24.19933395  |
| 60 | f | 314.88650906 | 112 | h | 23.88541538  |
| 61 | c | 63.73275037  | 113 | h | 23.97628391  |
| 62 | c | 24.29871109  | 114 | h | 25.20241056  |
| 63 | c | 35.17247190  | 115 | h | 24.87165676  |
| 64 | c | 30.96205396  | 116 | h | 22.44338995  |
| 65 | c | 35.87197596  | 117 | h | 28.99676062  |
| 66 | c | 26.34372253  |     |   |              |
| 67 | f | 309.86420216 |     |   |              |
| 68 | f | 341.03118306 |     |   |              |
| 69 | f | 326.00760654 |     |   |              |
| 70 | f | 341.25218411 |     |   |              |
| 71 | f | 315.41937761 |     |   |              |
| 72 | c | 61.15318638  |     |   |              |
| 73 | c | 33.47271872  |     |   |              |
| 74 | c | 37.76710602  |     |   |              |
| 75 | c | 32.18478855  |     |   |              |
| 76 | c | 38.18435247  |     |   |              |

**Bisphosphorous [30]hexaphyrin**

| NO. | TYPE | ISOTROPIC   |
|-----|------|-------------|
| 1   | n    | 90.51700758 |
| 2   | c    | 16.52994483 |
| 3   | c    | 56.92333573 |
| 4   | c    | 38.06333686 |
| 5   | c    | 19.79571898 |
| 6   | c    | 66.88260707 |
| 7   | c    | 65.57276982 |

---

|    |   |              |     |   |              |
|----|---|--------------|-----|---|--------------|
| 8  | c | 26.87835188  | 60  | c | 26.81772908  |
| 9  | c | 35.91220727  | 61  | f | 311.10833629 |
| 10 | c | 31.67296005  | 62  | f | 340.62482101 |
| 11 | c | 35.29828975  | 63  | f | 327.21582012 |
| 12 | c | 25.59198666  | 64  | f | 338.03004660 |
| 13 | c | 75.92165826  | 65  | f | 310.68093822 |
| 14 | c | 58.69368279  | 66  | c | 37.36624187  |
| 15 | c | 20.87324196  | 67  | c | 51.29907206  |
| 16 | c | 34.26192809  | 68  | c | 69.36192493  |
| 17 | c | 30.13661706  | 69  | c | 36.86455362  |
| 18 | c | 33.06085334  | 70  | n | 101.34834592 |
| 19 | c | 26.30809348  | 71  | c | 82.74450322  |
| 20 | f | 315.92261583 | 72  | c | 67.78065138  |
| 21 | f | 342.57666574 | 73  | c | 28.43274914  |
| 22 | f | 328.14270023 | 74  | c | 35.96419832  |
| 23 | f | 339.93879986 | 75  | c | 32.38433357  |
| 24 | f | 306.12945050 | 76  | c | 35.36039721  |
| 25 | f | 307.64257054 | 77  | c | 26.64666809  |
| 26 | f | 335.08298839 | 78  | p | 290.80572339 |
| 27 | f | 329.26594845 | 79  | o | 58.27132439  |
| 28 | f | 340.57192123 | 80  | f | 312.03898415 |
| 29 | f | 308.94670906 | 81  | f | 338.85021760 |
| 30 | p | 287.26645697 | 82  | f | 327.64229019 |
| 31 | o | 96.14006888  | 83  | f | 340.64470289 |
| 32 | c | 32.31249420  | 84  | f | 308.97761740 |
| 33 | c | 66.73624865  | 85  | c | 29.10139325  |
| 34 | c | 68.01341966  | 86  | c | 54.14013310  |
| 35 | c | 42.56446922  | 87  | c | 52.05433755  |
| 36 | n | 67.27060884  | 88  | c | 35.00697495  |
| 37 | c | 76.14750940  | 89  | n | 88.46546039  |
| 38 | c | 65.35190425  | 90  | c | 70.54557030  |
| 39 | c | 26.46729422  | 91  | c | 64.51281336  |
| 40 | c | 35.53476440  | 92  | c | 26.23976382  |
| 41 | c | 31.44839828  | 93  | c | 35.77056842  |
| 42 | c | 36.29250226  | 94  | c | 32.07630047  |
| 43 | c | 26.89090105  | 95  | c | 36.05179078  |
| 44 | f | 311.38223201 | 96  | c | 27.74814128  |
| 45 | f | 341.15444689 | 97  | f | 309.75243356 |
| 46 | f | 326.69611765 | 98  | f | 341.83070397 |
| 47 | f | 340.47596937 | 99  | f | 327.50119309 |
| 48 | f | 314.26492209 | 100 | f | 342.61756260 |
| 49 | c | 24.31927410  | 101 | f | 315.77802934 |
| 50 | c | 50.98443750  | 102 | c | 38.38449139  |
| 51 | c | 47.06127010  | 103 | c | 76.61454091  |
| 52 | c | 24.04039083  | 104 | c | 62.53275992  |
| 53 | n | 76.99139588  | 105 | c | 36.51943452  |
| 54 | c | 73.30115275  | 106 | n | 60.17518619  |
| 55 | c | 62.27113995  | 107 | h | 25.68348276  |
| 56 | c | 28.32374758  | 108 | h | 26.72053476  |
| 57 | c | 36.20537841  | 109 | h | 26.03310570  |
| 58 | c | 32.05106861  | 110 | h | 26.29713672  |
| 59 | c | 35.86984520  | 111 | h | 17.15350650  |

|     |   |             |
|-----|---|-------------|
| 112 | h | 27.13625910 |
| 113 | h | 26.64711728 |
| 114 | h | 26.78945979 |
| 115 | h | 26.79500074 |
| 116 | h | 25.99992850 |
| 117 | h | 24.84491639 |
| 118 | h | 26.90519271 |

### 3 Details for Figure 3 of main manuscript

Figure 1 illustrates at which bond (red) the integration plane for obtaining the current strength function with respect to the applied magnetic field (black arrows) was placed. The integration planes were placed perpendicular to bond C<sub>80</sub>–C<sub>100</sub> for (PO)[28]hp and bond C<sub>54</sub>–C<sub>66</sub> for (PO)<sub>2</sub>[30]hp. The x, y, z components of the applied magnetic field are given below.

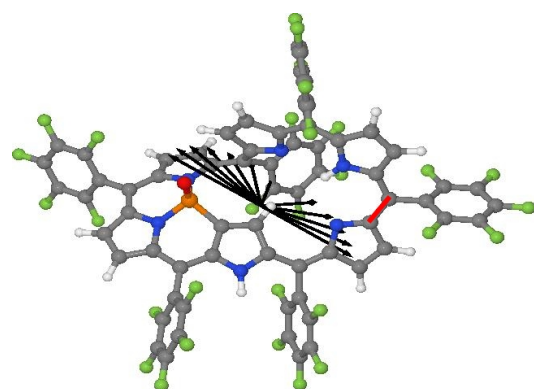

(a) Monophosphorous [28]hexaphyrin, (PO)[28]hp

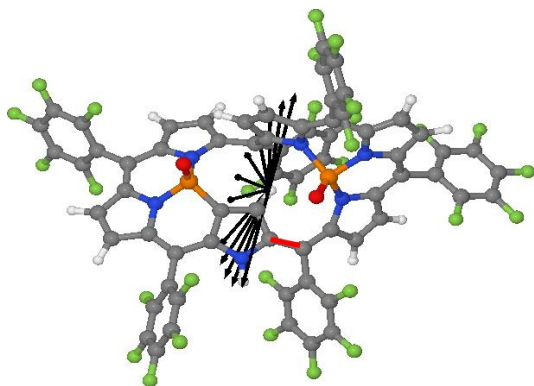

(b) Bisphosphorous [30]hexaphyrin, (PO)<sub>2</sub>[30]hp

**Fig. 1** Illustration of the relative orientation and placement of the external magnetic field (black arrows) for obtaining the current strength function. The integration planes were placed perpendicular to bond C<sub>80</sub>–C<sub>100</sub> for (PO)[28]hp and bond C<sub>54</sub>–C<sub>66</sub> for (PO)<sub>2</sub>[30]hp. The respective bonds are marked red.

#### B field components used for (PO)[28]hp

| B_x      | B_y      | B_z      |
|----------|----------|----------|
| 0.69249  | -0.68669 | 0.22117  |
| 0.67501  | -0.73701 | -0.03439 |
| 0.61152  | -0.73710 | -0.28761 |
| 0.50636  | -0.68697 | -0.52122 |
| 0.36670  | -0.59001 | -0.71932 |
| 0.20204  | -0.45285 | -0.86839 |
| 0.02361  | -0.28483 | -0.95829 |
| -0.15642 | -0.09740 | -0.98288 |
| -0.32580 | 0.09667  | -0.94048 |
| -0.47297 | 0.28415  | -0.83400 |
| -0.58791 | 0.45227  | -0.67068 |
| -0.66279 | 0.58957  | -0.46165 |
| -0.69249 | 0.68669  | -0.22117 |

#### B field components used for (PO)<sub>2</sub>[30]hp

| B_x      | B_y      | B_z      |
|----------|----------|----------|
| 0.37461  | 0.77445  | -0.50979 |
| 0.23012  | 0.67357  | -0.70239 |
| 0.06994  | 0.52678  | -0.84712 |
| -0.09500 | 0.34409  | -0.93412 |
| -0.25346 | 0.13796  | -0.95746 |
| -0.39465 | -0.07758 | -0.91555 |
| -0.50895 | -0.28783 | -0.81125 |
| -0.58856 | -0.47847 | -0.65166 |
| -0.62807 | -0.63650 | -0.44766 |
| -0.62477 | -0.75115 | -0.21316 |
| -0.57889 | -0.81461 | 0.03587  |
| -0.49357 | -0.82256 | 0.28246  |
| -0.37461 | -0.77445 | 0.50979  |
